# Supplementary material for: The Responses of Germ-Free Zebrafish (Danio rerio) to Varying Bacterial Concentrations, Colonization Time Points, and Exposure Duration
Source: Front Microbiol. 2019 Sep 18;10:2156. doi: 10.3389/fmicb.2019.02156 (PMC6760068; doi:10.3389/fmicb.2019.02156)
Supplement: Supplementary file 1 [file Data_Sheet_1.docx]

The Responses of Germ-Free Zebrafish (*Danio rerio*) to Varying Bacterial Concentrations, Colonization Time Points and Exposure Duration

Fang Tan1, Samwel Mchele Limbu1,2, Ye Qian1, Fang Qiao1, Zhen-Yu Du1*, Meiling Zhang1*

1Laboratory of Aquaculture Nutrition and Environmental Health, School of Life Sciences, East China Normal University, Shanghai, 200241, China

2Department of Aquatic Sciences and Fisheries Technology, University of Dar es Salaam, P.O. Box 35064, Dar es Salaam, Tanzania

*** Correspondence:**

Zhen-Yu Du

Email: [zydu@bio.ecnu.edu.cn](mailto:zydu@bio.ecnu.edu.cn) Tel/Fax: 86-21-54345354

Meiling Zhang

Email: [mlzhang@bio.ecnu.edu.cn](mailto:mlzhang@bio.ecnu.edu.cn) Tel/Fax: 86-21-54345354

Running title: Bacteria mono-association of germ-free zebrafish

| Gene name | Forward (5′-3′) | Reverse (5′-3′) | Sequence Numbers |
| --- | --- | --- | --- |
| In zebrafish (*Danio rerio*) | | |  |
| **Elongation factor 1α (*ef-1α*)** | CTGGAGGCCAGCTCAAACAT | ATCAAGAAGAGTAGTACCGCTAGCATTAC | FJ915061.1 |
| **Glyceraldehyde-3-phosphate dehydrogenase(*gapdh*)** | CGCTGGCATCTCCCTCAA | TCAGCAACACGATGGCTGTAG | NM_213094.2 |
| **Bata-actin(*β-actin*)** | CGAGCTGTCTTCCCATCCA | TCACCAACGTAGCTGTCTTTCTG | XM_028814403.1 |
| **Signal transducer and activator of transcription 3(*state3*)** | TAACCTCTTACTCATCCTCCA | AAGAGGTTGTAGAAGTAGA | CR847978.18 |
| **Cell division cycle 25A (*cdc25a*)** | TCGCTCTCCTGCCTTCAAGA | GACAGCGAATGACAGGCGAA | EU921896.1 |
| **Fasting-inducing adipose factor (*fiaf*)** | CGAGCGCATCAAGCAACA | TCGCTCGTTTTTCATCGTAATCT | NM_001256203.1 |
| **Carnitine palmitoyltransferase 1a (*cpt1a*)** | GCAGATGACGGTTATGGTGTTTC | CCGTCTCAGGACTGGAGAACTT | NM_001005940.1 |
| **X-box binding protein 1 (*xbp-1*)** | TGCGAGACAAGACGAGTGAT | CAGTACCTGAACCTGCTCCTT | BC164779.1 |
| **Activating transcription factor 6 (*Atf6*)** | CTTCAGACGCCTCAGTCAATG | GACCACAGGAGATGTTGTTACC | NM_001110519.1 |
| **Serum amyloid a (*saa*)** | CGCAGAGGCAATTCAGAT | CAGGCCTTTAAGTCTGTATTTGTTG | NM_001005599.1 |
| **Complement factor b (*bf*)** | GCCACAGTGCTACGCTGATTT | GTTGAACTGTTAGAGTTGTCGTTAGAGAATT | XM_021468751.1 |
| **Proliferating cell nuclear antigen (*pcna*)** | GATGGTAGTTTGGGCCTTAGCTTT | AAAAACAAGACTGAATGTGGAGTATGTAC | NM_131404.2 |
| **Heat-shock protein (*hsp70*)** | ACCAGGGCAACAGAACAACA | GTCATCAAACCTCCTGCCGA | NM_001113589 |
| **Myeloiddifferentiationfactor88 (*myd88*)** | TCACGTACCTGGAGATCAAAAACTTCGAG | CCACTGGAACCTGAAGCGGTTTCCTC | NM_212814.2 |
| **Solute carrier family 6 member 4 (*Slc4a6a*)** | AGTGGACCTGGGCAATG | AGAAGATACGGCAAGAGAAG | DQ285098 |
| **Monoamine oxidase (*mao*)** | GCAGTCAGAGCCCGAATC | CACACCCATAAACTTGAGGAATC | NM_212827 |
| **Glucokinase (*gk*)** | GAGAGGACTGCGTGTGGAGACA | TCACCAACCTCGGAGCCTTCAG | NM_001045385.2 |
| **5-hydroxytryptamine (serotonin) receptor 1A**  **(*htr1a*)** | AGAGCAGCGAGGTGAC | GAGCCGATGATTTGGTAAC | EH441641 |
| **Tryptophan hydroxylase 1a (*tph1a*)** | CAGTTCAGTCAGGAGATTGG | GACAGTGCGTGCTTCAG | AF548566 |
| **Brain derived neurotrophic factor (*bdnf*)** | GCTCAGTCATGGGAGTCC | ATAGTAACGAACAGGATGG | U42489 |
| **Interleukin-10 (*il-10*)** | ATTTGTGGAGGGCTTTCCTT | AGAGCTGTTGGCAGAATGGT | NM_001020785.2 |
| **Interleukin-1β (*il-1β*)** | GAGACAGACGGTGCTGTTTA | GTAAGACGGCACTGAATCCA | NM_212844.2 |
| **Tumor Necrosis Factor α （*tnf-α*）** | CAGAGTTGTATCCACCTGTTA | TTCACGCTCCATAAGACCCA | NM_212859.2 |

**Supplementary Table S1.**

The primer sequences used for qPCR in the present study

**Supplementary Table S2.**

The results of normality test for measured genes in the present study

|  | ***E. coli*** | | | ***B. subtilis*** | |
| --- | --- | --- | --- | --- | --- |
| **Genes** | | **Statistic** | **P-value** | **Statistic** | **P-value** |
| *GK* | | 0.951 | *0.812 | 0.971 | *0.970 |
| *state3* | | 0.722 | **0.002 | 0.807 | 0.838 |
| *cdc25a* | | 0.983 | 0.103 | 0.875 | 0.565 |
| *xbp-1* | | 0.862 | 0.851 | 0.943 | *0.365 |
| *atf-6* | | 0.981 | 0.314 | 0.932 | *0.138 |
| *bf* | | 0.955 | 0.339 | 0.9221 | **0.021 |
| *pcna* | | 0.728 | *0.052 | 0.921 | *0.137 |
| *hsp70* | | 0.985 | 0.078 | 0.956 | 0.606 |
| *myd88* | | 0.864 | 0.596 | 0.790 | **0.014 |
| *saa* | | 0.981 | *0.877 | 0.931 | 0.055 |
| *fiaf* | | 0.953 | 0.166 | 0.784 | 0.388 |
| *cpt1a* | | 0.724 | *0.064 | 0.710 | *0.098 |
| *il-10* | | 0.987 | *0.061 | 0.871 | *0.461 |
| *tnf-a* | | 0.860 | 0.682 | 0.986 | 0.684 |
| *il-1b* | | 0.981 | 0.081 | 0.761 | 0.304 |
| *htr1aa* | | 0.953 | 0.282 | 0.954 | 0.282 |
| *tph1a* | | 0.723 | **0.006 | 0.721 | *0.073 |
| *mao* | | 0.986 | 0.861 | 0.985 | *0.858 |
| *slc4a6a* | | 0.862 | *0.491 | 0.863 | *0.491 |
| *bdnf* | | 0.981 | 0.816 | 0.981 | 0.816 |

Numbers without a symbol for p values were normally distributed (p > 0.05). The symbol * indicates the results of p values for data which were normally distributed after log transformation, while ** shows the p values results of parameters that were not normally distributed even after log transformation.

**Supplementary Figure S1.**


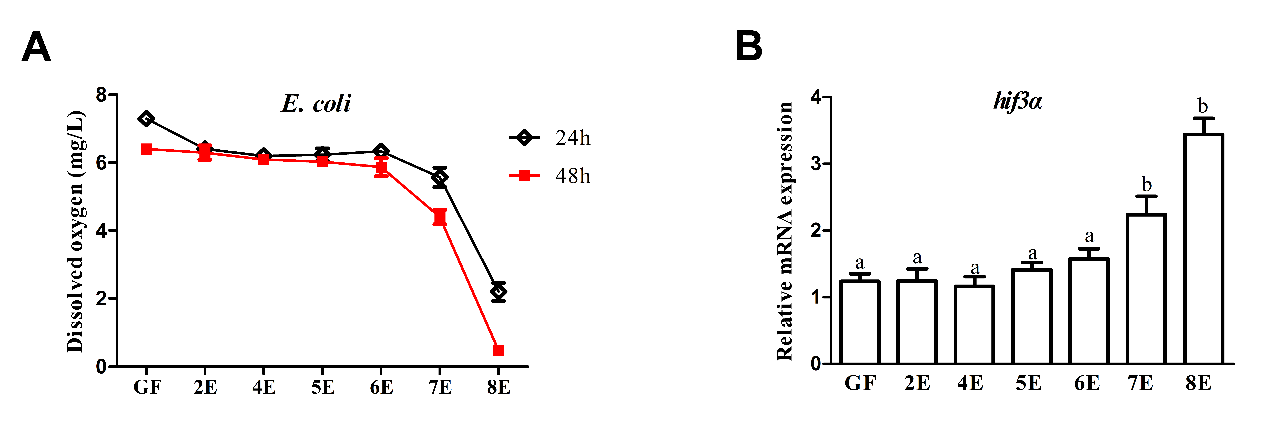


Dissolved oxygen level in the media and the expression level of hypoxia inducible factors 3α (*hif3α*)when zebrafish were inoculated with *E. coli* DH5α*.* (**A**) Dissolved oxygen level of media of GF group and all mono-associated groups (inoculated with *E. coli* DH5α ranging from 102 CFU/ml to 108 CFU/ml at 3 dpf and immersed for 24 h or 48 h). (**B**) The expression level of *hif3α* of GF group and all mono-associated groups (inoculated with *E. coli* DH5α ranging from 102 CFU/ml to 108 CFU/ml at 3 dpf and immersed for 24 h). All data (A, B) are presented as means ± SEM, n = 45 per group.

**Supplementary Figure S2.**


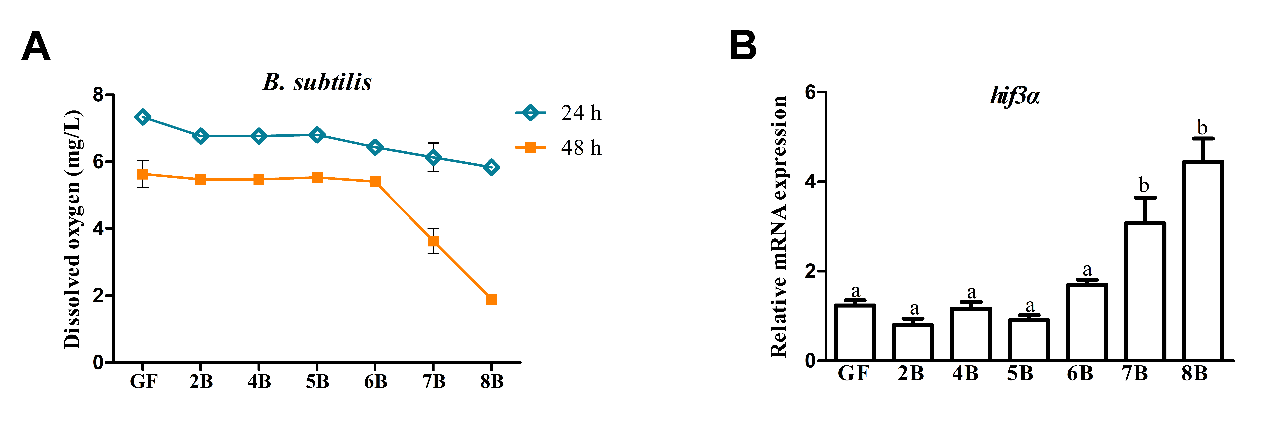


Dissolved oxygen level in the media and the mRNA expression level of hypoxia inducible factors 3 alpha (*hif3α*)when zebrafish were inoculated with *B. subtilis* WB800N*.* (**A**) Dissolved oxygen level of media of GF group and all mono-associated groups (inoculated with *B. subtilis* WB800N ranging from 102 CFU/ml to 108 CFU/ml at 3 dpf and immersed for 24 h or 48 h). (**B**) The expression level of *hif3α* of GF group and all mono-associated groups (inoculated with *B. subtilis* WB800N ranging from 102 CFU/ml to 108 CFU/ml at 3 dpf and immersed for 24 h). All data are presented as means ± SEM, n = 45 per group.

**Supplementary Figure S3**


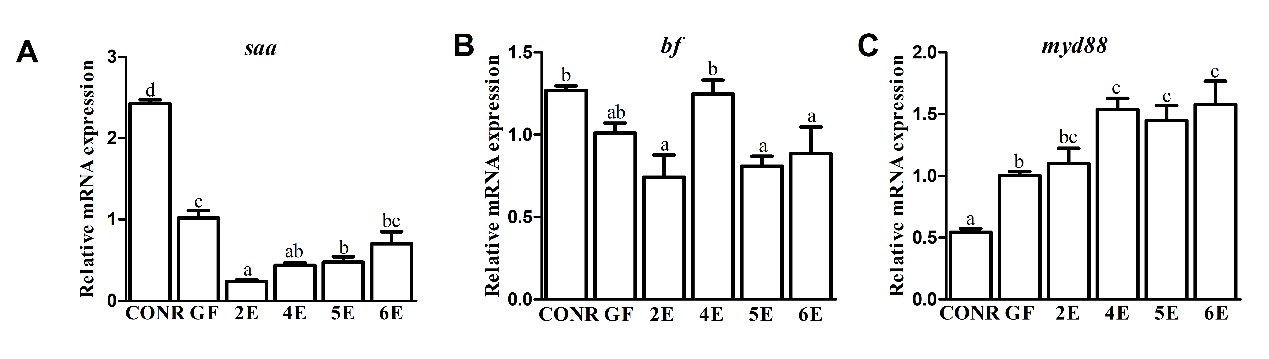


Comparisons of gene expression levels among GF zebrafish, CONR zebrafish and mono-associated zebrafish (inoculated with *E. coli* DH5α ranging from 102 CFU/ml to 106 CFU/ml at 3 dpf and immersed for 24 h). (**A**) The expression levels of immunity related genes *saa*, (**B**) *bf* and(**C**) *myd88.* All results are shown as means ± SEM of six replicates for each experiment, n = 90, per group. Different letters indicate statistically significant differences among groups (p < 0.05).

**Supplementary Figure S4.**


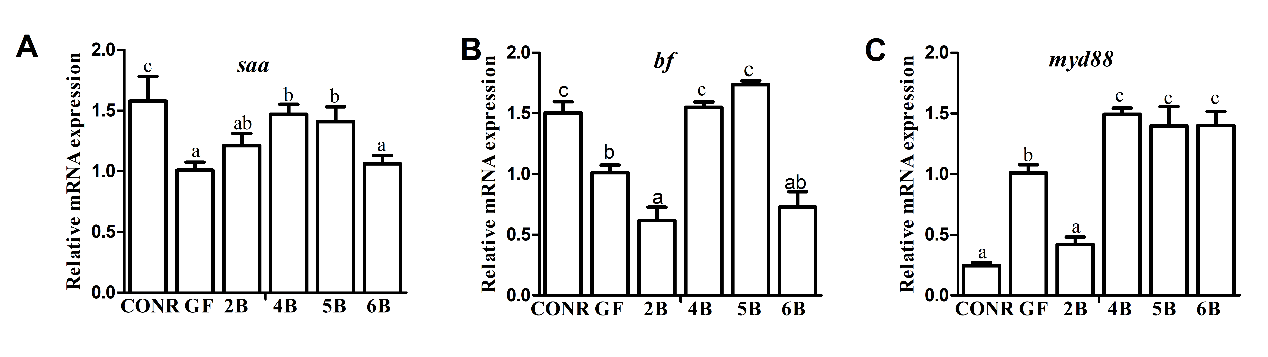


Comparisons of gene expression levels among GF zebrafish, CONR zebrafish and mono-associated zebrafish (inoculated with *B. subtilis* WB800N ranging from 102 CFU/ml to 106 CFU/ml at 3 dpf and immersed for 24 h). **(A)** The expression levels of immunity related genes *saa*, **(B)** *bf* and **(C)** *myd88*. The results are shown as means ± SEM of six replicates for each experiment, n = 90, per group. Different letters indicate statistically significant differences among groups (p < 0.05).
